# Supplementary material for: Catalytic effects of graphene structures on Pt/graphene catalysts
Source: Royal Society of Chemistry journal article supplement (doi:10.1039/d4ra02841d), 2024-01-01
Supplement: d4ra02841d1.pdf [file d4ra02841d1.pdf]

## Supplemental Information

### The catalytic effect of graphene structure on Pt/graphene catalysts

Zhenzhen Du,<sup>ab</sup> Fan Yu,<sup>b</sup> Jun Wang,<sup>ab</sup> Jiongli Li<sup>ab</sup>, Xudong Wang<sup>\*ab</sup> and Aniu Qian<sup>\*c</sup>

a. AECC Beijing Institute of Aeronautical Materials, Beijing 100095, China. E-mail: netfacn@163.com

b. Beijing Institute of Graphene Technology, Beijing 100094, China

c. Institute of Resources and Environment Engineering, Shanxi University, Taiyuan 030006, China. E-mail: anqian@sxu.edu.cn

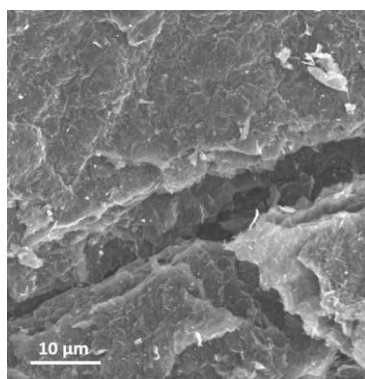

**Fig. S1** SEM image of NGO.

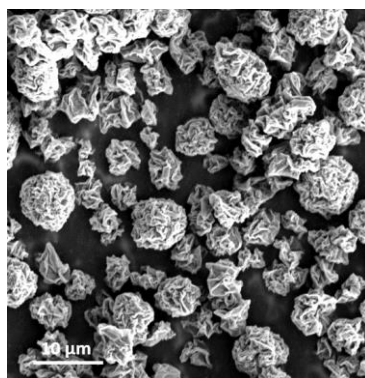

**Fig. S2** SEM image of GO.

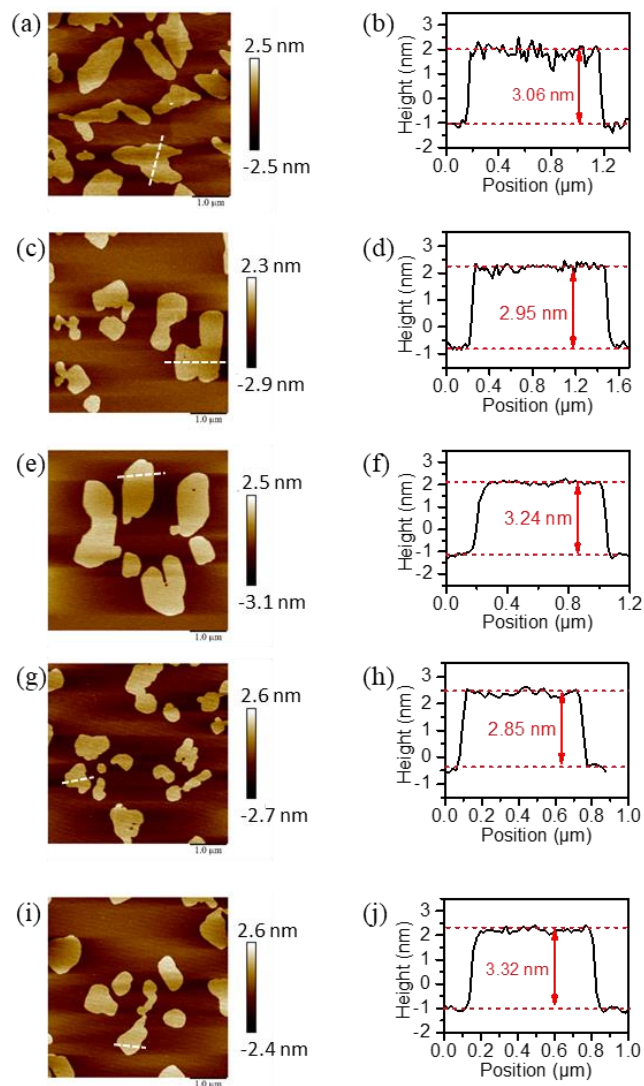

**Fig. S3** AFM images and height profiles of (a, b) GO, (c, d) P-NRGO, (e, f) NRGO, (g, h) TP-NRGO and (i, j) RGO.

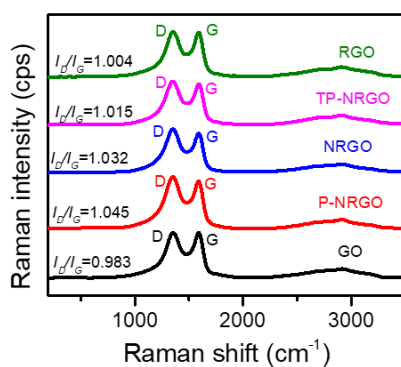

**Fig. S4** Raman spectra of GO, P-NRGO, NRGO, TP-NRGO and RGO.

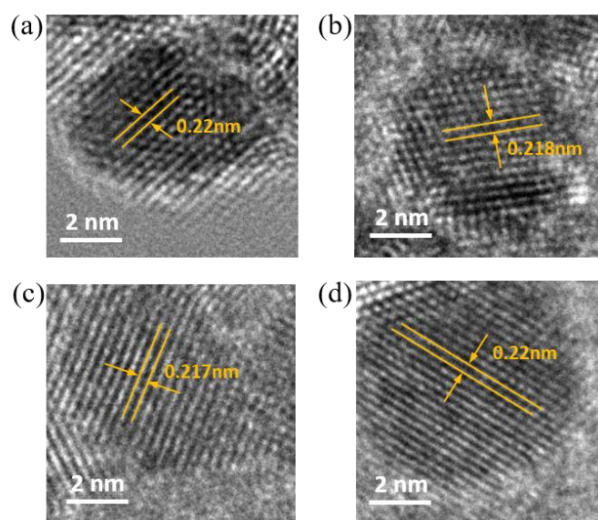

**Fig. S5** High resolution TEM images showing the lattice and d-spacing value of (a) Pt/P-NRGO, (b) Pt/NRGO, (c) Pt/TP-NRGO and (d) Pt/RGO.

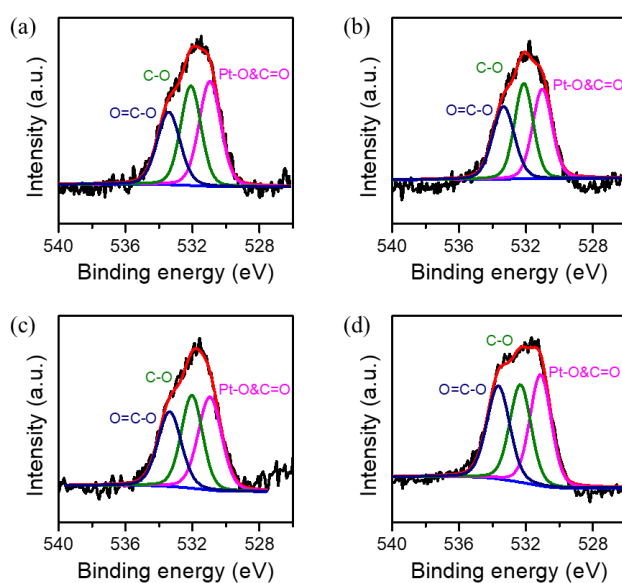

**Fig. S6** High-resolution O 1s XPS spectra of (a) Pt/P-NRGO, (b) Pt/NRGO, (c) Pt/TP-NRGO and (d) Pt/RGO. The binding energy at 531.1 eV can be attributed to Pt-O & C=O, and the peak of C=O covers the peak of Pt-O bond.

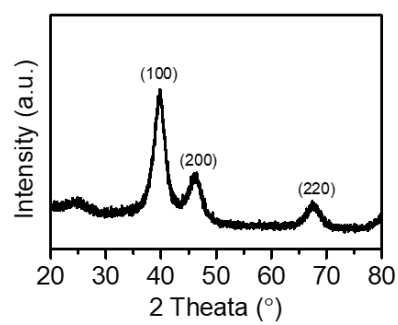

**Fig. S7.** XRD pattern of commercial Pt/C catalyst.

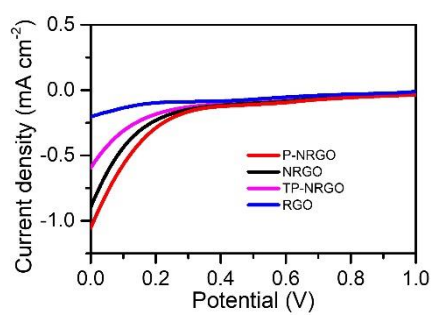

**Fig. S8** ORR polarization curves of P-NRGO, NRGO, TP-NRGO and RGO supports. ORR polarization curves were conducted in  $\text{O}_2$ -saturated 0.5 M  $\text{H}_2\text{SO}_4$  electrolyte at a scan rate of  $10 \text{ mV s}^{-1}$  and a rotation of 1600 rpm.

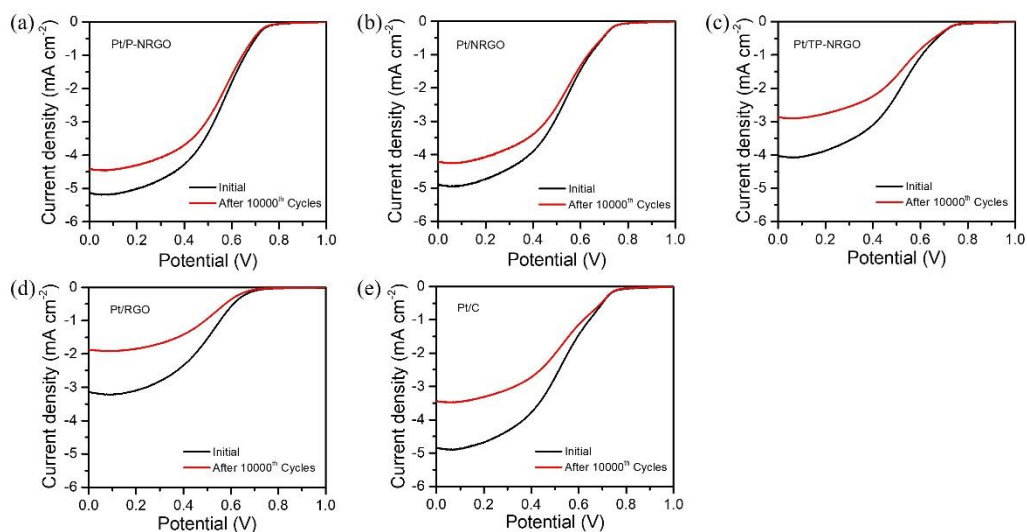

**Fig. S9** ORR polarization curves of (a) Pt/P-NRGO, (b) Pt/NRGO, (c) Pt/TP-NRGO, (d) Pt/RGO and (e) Pt/C catalysts before and after 10000<sup>th</sup> cycles of CV in O<sub>2</sub>-saturated 0.5 M H<sub>2</sub>SO<sub>4</sub> electrolyte.

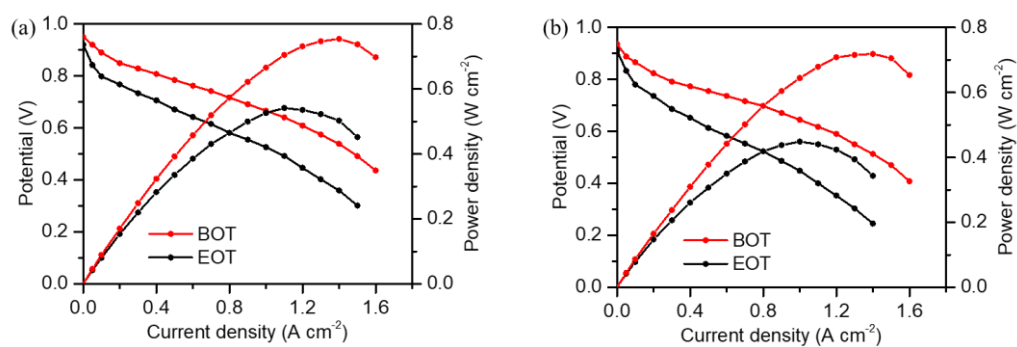

**Fig. S10** (a) Polarization and power density plots of MEA assembled with Pt/P-NRGO at BOT and EOT. (b) Polarization and power density plots of MEA assembled with commercial Pt/C at BOT and EOT.

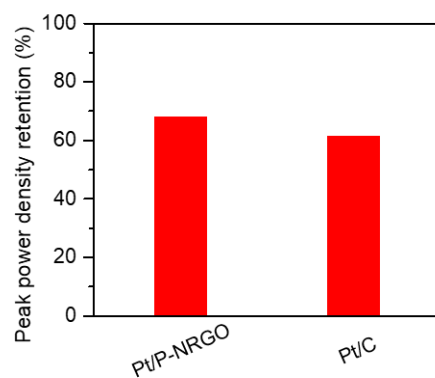

**Fig. S11** Peak power density retention for Pt/P-NRGO and commercial Pt/C from BOT to EOT.

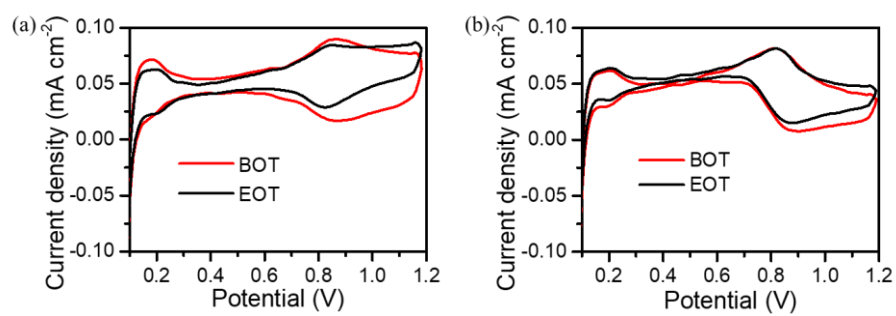

**Fig. S12** (a) CV curves of MEA assembled with Pt/P-NRGO at BOT and EOT. (b) CV curves of MEA assembled with commercial Pt/C at BOT and EOT.

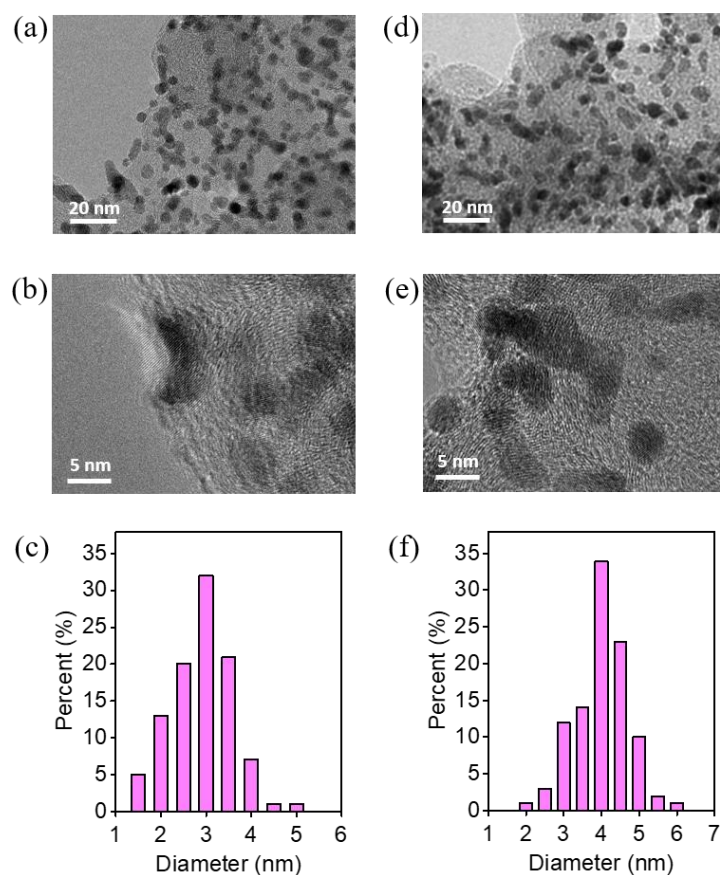

**Fig. S13** (a, b) TEM images with different magnifications for Pt/C at BOT. (d, e) TEM images with different magnifications for commercial Pt/C at EOT. Pt particle size distribution of commercial Pt/C at (c) BOT and (f) EOT.

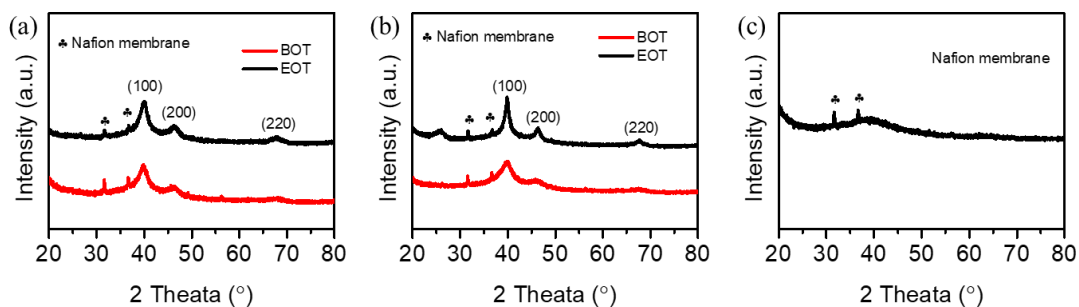

**Fig. S14** (a) XRD patterns of Pt/P-NRGO at BOT and EOT. (b) XRD patterns of commercial Pt/C at BOT and EOT. (c) XRD pattern of Nafion membrane. The XRD analyses for catalysts were tested using catalyst coated membrane (CCM).

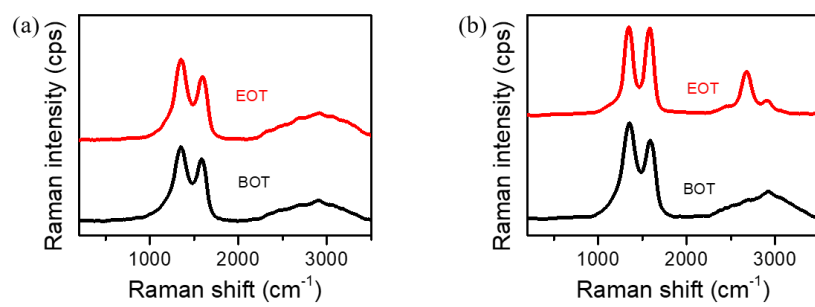

**Fig. S15** Raman spectra of Pt/P-NRGO at BOT and EOT. (b) Raman spectra of commercial Pt/C at BOT and EOT.

**Table S1** The percentage of different types of N in the P-NRGO, NRGO and TP-NRGO materials obtained from the XPS analysis.

|         | Pyridinic N<br>(%) | Pyrrolic N<br>(%) | Graphitic N<br>(%) | Oxidized N<br>(%) |
|---------|--------------------|-------------------|--------------------|-------------------|
| P-NRGO  | 32.78              | 32.13             | 21.98              | 13.11             |
| NRGO    | 35.35              | 34.15             | 21.33              | 9.17              |
| TP-NRGO | 39.17              | 27.77             | 19.04              | 14.02             |

**Table S2** The percentage of different types of N in the Pt/P-NRGO, Pt/NRGO and Pt/TP-NRGO catalysts obtained from the XPS analysis.

|            | Pyridinic N<br>(%) | Pyrrolic N<br>(%) | Graphitic N<br>(%) | Oxidized N<br>(%) |
|------------|--------------------|-------------------|--------------------|-------------------|
| Pt/P-NRGO  | 40.33              | 31.80             | 21.72              | 6.15              |
| Pt/NRGO    | 36.36              | 31.08             | 21.05              | 11.51             |
| Pt/TP-NRGO | 40.92              | 26.70             | 19.49              | 12.89             |

**Table S3** Electrochemical active surface area (ECSA), mass activity (MA), and specific activity (SA) comparison of catalysts based on a three-electrode system test results.

|            | ECSA<br>(m <sup>2</sup> /g) | MA<br>(A/mg) | SA<br>(mA/cm <sup>2</sup> ) |
|------------|-----------------------------|--------------|-----------------------------|
| Pt/P-NRGO  | 97.4                        | 0.53         | 0.54                        |
| Pt/NRGO    | 84.7                        | 0.45         | 0.53                        |
| Pt/TP-NRGO | 87.1                        | 0.35         | 0.40                        |
| Pt/RGO     | 40.6                        | 0.17         | 0.41                        |
| Pt/C       | 84.2                        | 0.43         | 0.51                        |
